# Supplementary material for: Characteristics of Interleukin-6 Signaling in Elective Cardiac Surgery—A Prospective Cohort Study
Source: MDPI journal article supplement (doi:10.3390/jcm11030590), 2022-01-25
Supplement: s1 [file s1]

**Supplemental Table S1. Demographic characteristics in patients with high vs. low sIL-6R/IL-6 ratio**

|                                        | Low sIL-6R/IL-6 Ratio | High sIL-6R/IL-6 Ratio | p-value |
|----------------------------------------|-----------------------|------------------------|---------|
| Preoperative risk indicators           |                       |                        |         |
| Male                                   | 3                     | 7                      | 0.1284  |
| Female                                 | 8                     | 3                      |         |
| Age (y)                                | 72 [68; 77]           | 56 [51; 61]            | 0.0005  |
| Height (cm)                            | 164 [156; 175]        | 175 [169; 178]         | 0.0615  |
| Weight (kg)                            | 72.0 [63.0; 83.0]     | 92.0 [83.9; 105.8]     | 0.0527  |
| Resistance                             | 380 [372; 463]        | 369 [331; 399]         | 0.5730  |
| Reactance                              | 35 [26; 51]           | 44 [36; 51]            | 0.4806  |
| Phase angle                            | 4.9 [3.7; 7.3]        | 6.7 [6.5; 7.3]         | 0.2816  |
| Frailty scale                          | 3.0 [2.0; 5.0]        | 1.0 [1.0; 2.0]         | 0.0048  |
| Comorbidities                          |                       |                        |         |
| Asthma                                 | 1 (9)                 | 0 (0)                  | 1.0     |
| COPD                                   | 3 (27)                | 3 (30)                 | 1.0     |
| NIDDM                                  | 2 (18)                | 1 (10)                 | 1.0     |
| IDDM                                   | 0 (0)                 | 0 (0)                  | 1.0     |
| Chronic kidney disease                 | 0 (0)                 | 1 (10)                 | 0.961   |
| Cardiac decompensation                 | 0 (0)                 | 0 (0)                  | 1.0     |
| PAOD                                   | 2 (18)                | 1 (10)                 | 1.0     |
| Atrial fibrillation                    | 4 (36)                | 0 (0)                  | 0.118   |
| Angina pectoris                        |                       |                        | 0.1058  |
| Absent                                 | 10 (91)               | 7 (70)                 |         |
| Stable                                 | 0 (0)                 | 3 (30)                 |         |
| Unstable                               | 1 (9)                 | 0 (0)                  |         |
| LVEF                                   |                       |                        | 0.09196 |
| >50%                                   | 5 (46)                | 9 (90)                 |         |
| 30-50%                                 | 5 (46)                | 1 (10)                 |         |
| <30%                                   | 1 (9)                 | 0 (0)                  |         |
| Surgical characteristics               |                       |                        |         |
| Procedure                              |                       |                        | 0.1142  |
| CABG                                   | 0 (0)                 | 3 (30)                 |         |
| Combined                               | 5 (46)                | 2 (20)                 |         |
| Valve                                  | 6 (55)                | 5 (50)                 |         |
| Reoperation                            | 4 (36)                | 2 (20)                 | 0.7298  |
| Anaesthesia duration (min)             | 486 [431; 592]        | 322 [312; 390]         | 0.0003  |
| Surgery (min)                          | 397 [3461; 498]       | 240 [202; 298]         | 0.0003  |
| CPB (min)                              | 176 [144; 225]        | 107 [93; 126]          | 0.0025  |
| AoCC (min)                             | 89 [68; 85]           | 76 [62; 85]            | 0.3443  |
| Balance <sub>intraoperative</sub> (ml) | 4460 [3832; 6294]     | 3794 [3109; 4091]      | 0.1321  |
| PRBC (units)                           | 2 [1; 3]              | 0 [0; 0]               | 0.0005  |
| Platelets (units)                      | 0 [0; 1]              | 0 [0; 0]               | 0.3279  |
| Fresh frozen plasma (units)            | 0 [0; 0]              | 0 [0; 0]               | 0.3908  |
| Fibrinogen (g)                         | 2 [0; 2]              | 0 [0; 0]               | 0.0036  |
| Coagulation factors (I.U.)             | 0 [0; 1250]           | 0 [0; 0]               | 0.0575  |
| Postoperative risk indicators          |                       |                        |         |
| SAPS 3                                 | 52 [41; 53]           | 36 [34; 39]            | 0.0835  |
| SOFA on ICU admission                  | 9.0 [8.5; 9.0]        | 6.0 [5.0; 7.0]         | 0.0004  |
| Length of ICU stay (d)                 | 5.0 [2.5; 9.0]        | 1 [1.0; 1.0]           | 0.0002  |

Values are presented as number (n) and percentage (%), or median (interquartile range). Abbreviations: AoCC, aortic cross-clamp; CABG, coronary artery bypass graft; COPD, chronic obstructive pulmonary disease; CPB, cardiopulmonary bypass; ICU, intensive care unit; IDDM, insulin-dependent diabetes mellitus; LVEF, left ventricular ejection fraction; NIDDM, non-insulin-dependent diabetes mellitus; PAOD, peripheral artery occlusive disease; PRBC, packed red blood cells; SAPS, simplified acute physiology score; SOFA, sepsis-related organ failure assessment score.
